# Supplementary material for: Understanding the temperature-dependent evolution of solution processed metal oxide transistor characteristics based on molecular precursor derived amorphous indium zinc oxide
Source: Royal Society of Chemistry journal article supplement (doi:10.1039/c6tc03915d), 2016-01-01
Supplement: c6tc03915d1.pdf [file c6tc03915d1.pdf]

## Supplementary Information

### Understanding the temperature-dependent evolution of solution processed metal oxide transistor characteristics based on molecular precursor derived amorphous indium zinc oxide

Shawn Sanctis,<sup>a</sup> Rudolf Hoffmann,<sup>a</sup> Ruben Precht,<sup>b</sup>

Wolfgang Anwand<sup>c</sup> and Jörg J. Schneider<sup>a\*</sup>

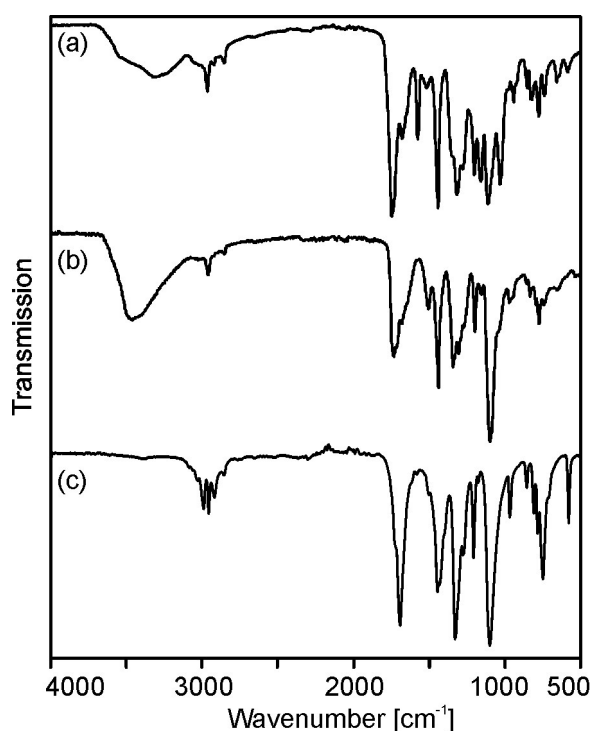

**Figure S1:** IR spectra of (a) dimethyl-2-nitromalonate<sup>16</sup>, (b) [Zn<sub>3</sub>(OH)<sub>4</sub>(dmm-NO<sub>2</sub>)<sub>2</sub>]<sup>16</sup> and (c) [In<sub>3</sub>O<sub>3</sub>(dmm-NO<sub>2</sub>)<sub>3</sub>]<sup>2</sup>·toluene (**2**).

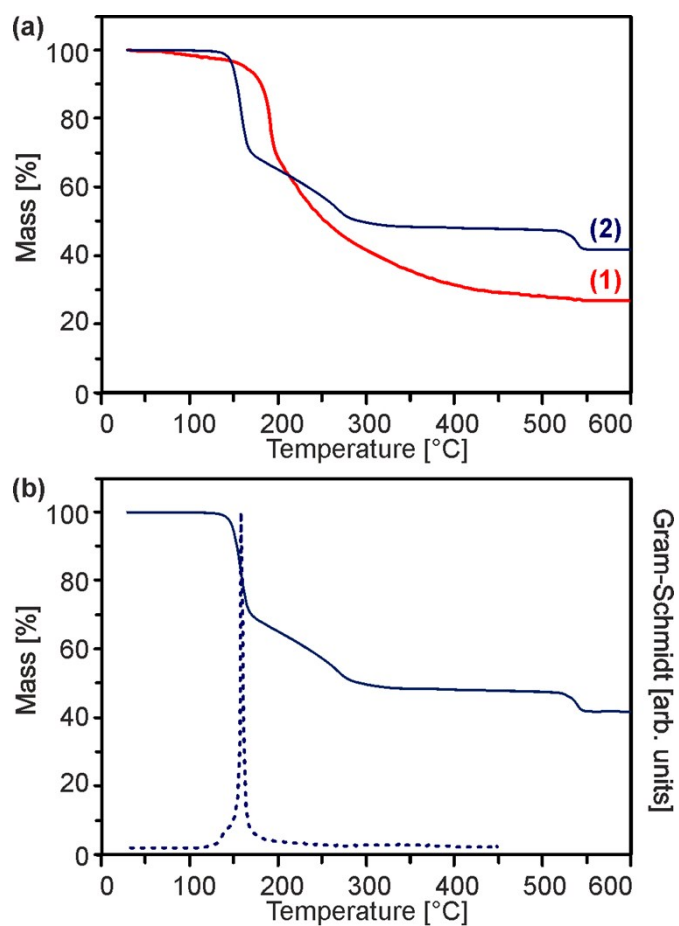

**Figure S2:** (a) Thermogravimetric mass loss curves of  $[\text{Zn}_4\text{O}(\text{dmm-NO})_6]$  (**1**) and  $\text{In}_3\text{O}_3(\text{dmm-NO}_2)_3$  (**2**) in oxygen. (b) Thermogravimetric mass loss curve (straight line) and corresponding Gram-Schmidt signal (dotted line) of (**2**).

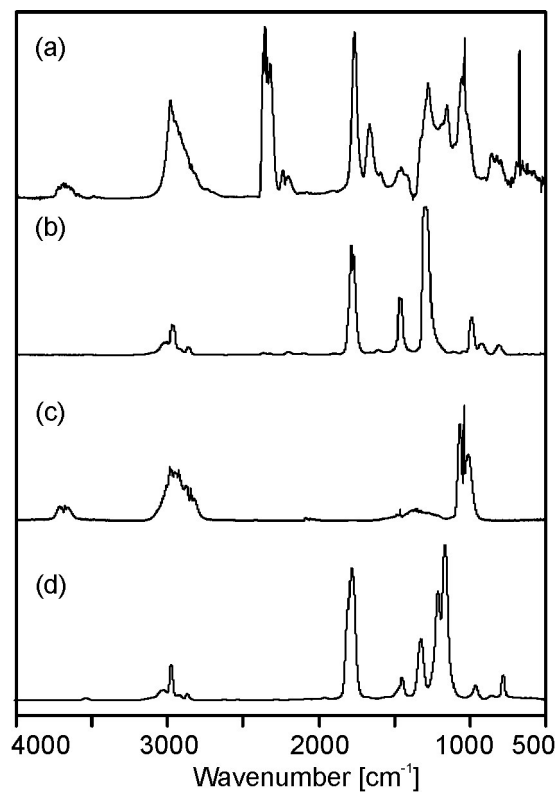

**Figure S3:** (a) Gas phase IR spectrum corresponding to the maximum of the Gram–Schmidt signal in Figure S1(b) from the decomposition of  $\text{In}_3\text{O}_3(\text{dmm-NO}_2)_3(\mathbf{2})$  as well as reference spectra of (b) dimethyl carbonate, (c) methanol and (d) dimethyl oxalate.

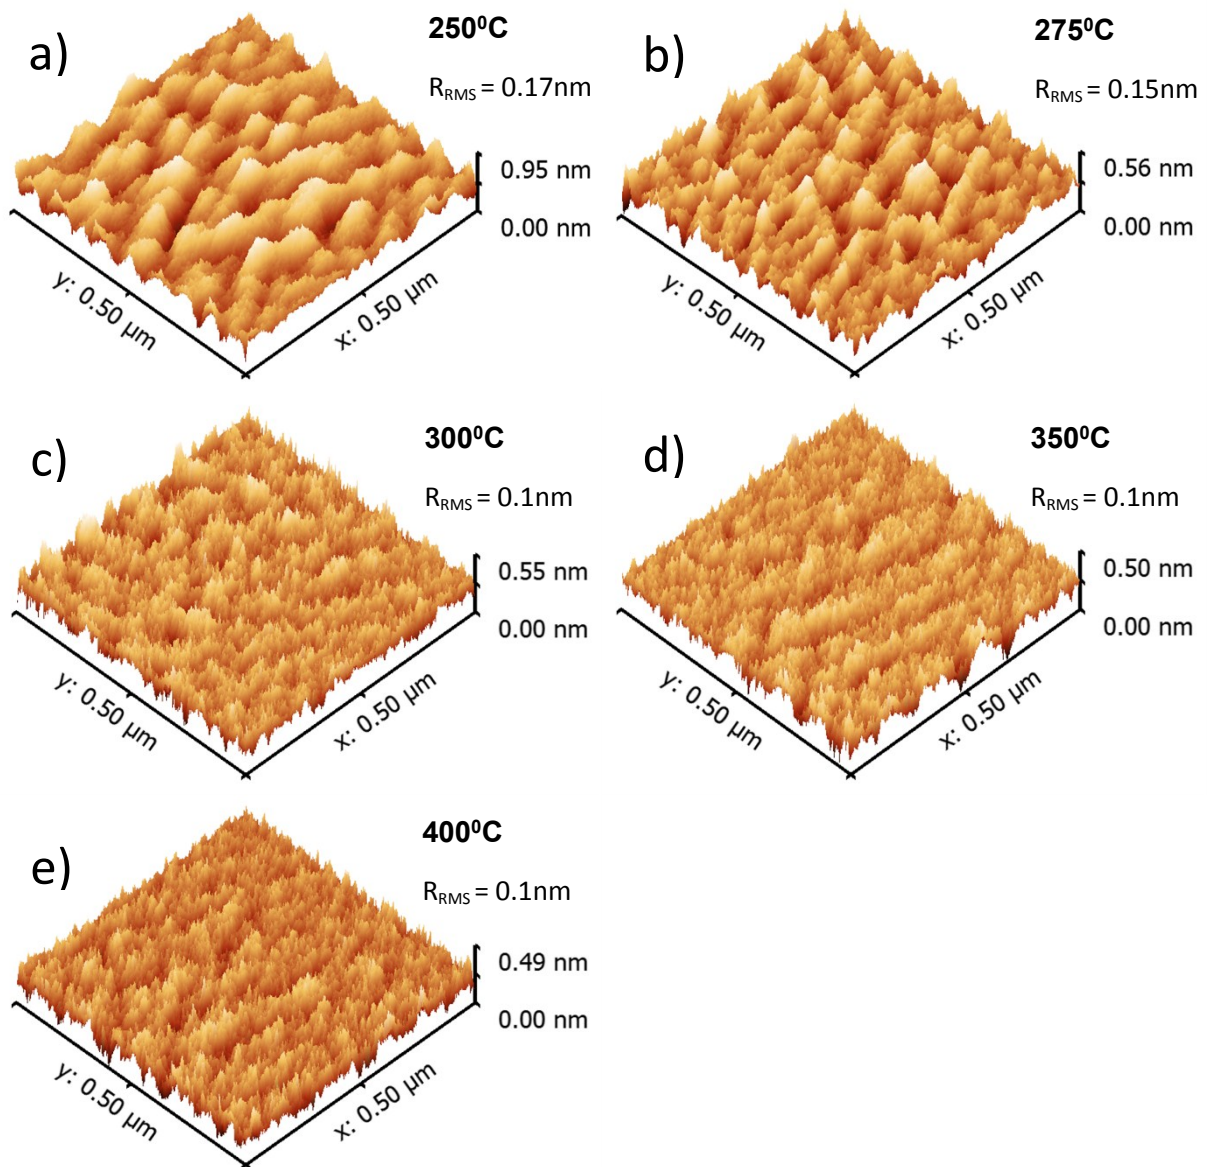

**Figure S4:** AFM micrographs and the obtained root mean square roughness ( $R_{RMS}$ ) for the IZO films annealed at increasing temperatures from 250 to 400°C.

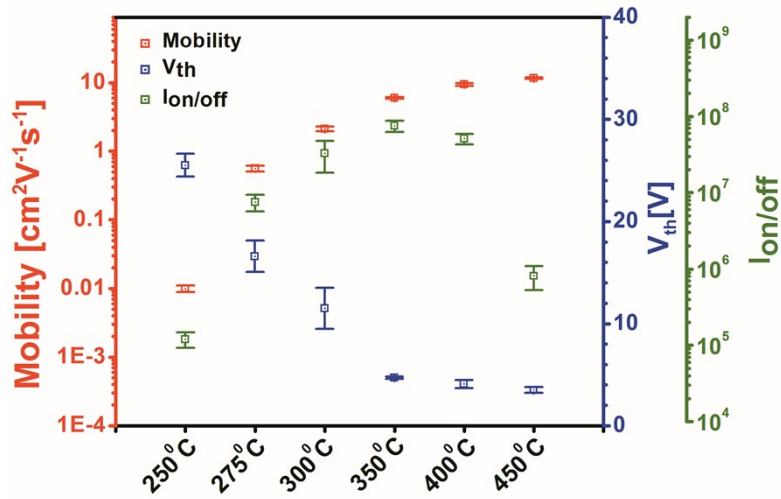

**Figure S5:** Averaged saturation field-effect mobility ( $\mu_{SAT}$ ), threshold voltage ( $V_{th}$ ) and current on-off ratio ( $I_{on/off}$ ) of eight devices with the corresponding standard deviations for the IZO TFTs annealed at increasing temperatures from 250 to 450°C.

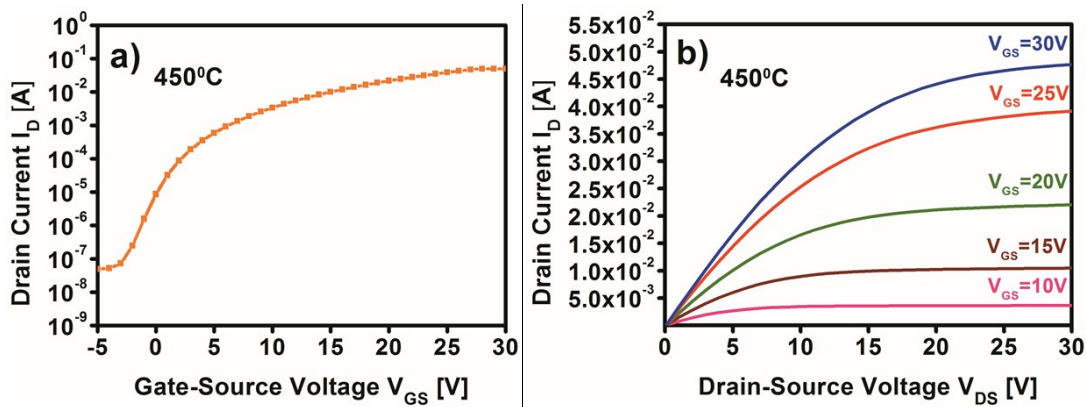

**Figure S6:** a) Transfer characteristics and b) Output characteristics of the TFT device for IZO films annealed at 450 °C.
